# Supplementary material for: A Review and Integration of Three Key Components of Identity Development
Source: Atypon-hosted journal article supplement (doi:10.1027/1016-9040/a000334), 2018-10-01
Supplement: 1016-9040_a000334_esm1.pdf [file 1016-9040_a000334_esm1.pdf]

**Electronic Supplementary Material by**  
**‘A Review and Integration of Three Key Components of Identity Development: Distinctiveness, Coherence, and Continuity’**

Table S1

*Empirical Studies on Distinctiveness*

| Authors                | Sample                                                                                                                                                | Age                                                                                          | Measure distinctiveness                                                        | Associations with psychosocial functioning                                                                                                                                                                                                                                                                                                                                                                                                                                                                                                      | Findings development                                    |
|------------------------|-------------------------------------------------------------------------------------------------------------------------------------------------------|----------------------------------------------------------------------------------------------|--------------------------------------------------------------------------------|-------------------------------------------------------------------------------------------------------------------------------------------------------------------------------------------------------------------------------------------------------------------------------------------------------------------------------------------------------------------------------------------------------------------------------------------------------------------------------------------------------------------------------------------------|---------------------------------------------------------|
| Aalsma et al. (2006)   | 6 <sup>th</sup> graders, $N = 94$<br>8 <sup>th</sup> graders, $N = 223$<br>10 <sup>th</sup> graders, $N = 142$<br>12 <sup>th</sup> graders, $N = 102$ | $M = 11.4, SD = 0.6$<br>$M = 13.4, SD = 0.6$<br>$M = 15.4, SD = 0.7$<br>$M = 17.5, SD = 0.7$ | NPFS Personal uniqueness                                                       | <ul style="list-style-type: none"> <li>– Depressive symptoms: <math>r = .33^*</math></li> <li>– Various measures of suicidal ideation, <math>r_s = .25^*</math> to <math>.33^*</math></li> <li>– Narcissism, <math>r = -.03</math></li> <li>– Risk behaviors, <math>r = .03</math></li> <li>– Substance use frequency, <math>r = .10</math></li> <li>– Life time drug use, <math>r = .10^*</math></li> <li>– Self-worth, <math>r = -.23^*</math> (6-8<sup>th</sup> graders) and <math>r = -.34^*</math> (10-12<sup>th</sup> graders)</li> </ul> | – No significant difference between grades.             |
| Alberts et al. (2007)  | Middle school students: grade 6, $N = 34$ , grade 7, $N = 41$ , grade 8, $N = 44$ .                                                                   | $M = 13.4, SD = 1.1$<br>Min. 11                                                              | PF speciality                                                                  |                                                                                                                                                                                                                                                                                                                                                                                                                                                                                                                                                 | – No significant difference between grades 6, 7, and 8. |
| Beaudoin et al. (2006) | Boys diagnosed with a behavioral disorder, $N = 29$ , and without, $N = 30$                                                                           | 12-17                                                                                        | NPFS Personal uniqueness                                                       | – No significant difference between boys with and without a diagnosis of behavioral diagnosis, $d = .36$                                                                                                                                                                                                                                                                                                                                                                                                                                        |                                                         |
| Becker et al. (2012)   | Late adolescents, $N = 5,158$                                                                                                                         | $M = 16.7$ , Max. 24                                                                         | Generation and rating of 10 identity aspects, based on Twenty Statements Test. | – Ratings of distinctiveness were positively associated with ratings of centrality and positive affect.                                                                                                                                                                                                                                                                                                                                                                                                                                         |                                                         |

| Authors                | Sample                                                                                                                           | Age                                                                  | Measure distinctiveness                  | Associations with psychosocial functioning                                                                                                                                                                                                                                                                                                                                                                                                                           | Findings development                                                          |
|------------------------|----------------------------------------------------------------------------------------------------------------------------------|----------------------------------------------------------------------|------------------------------------------|----------------------------------------------------------------------------------------------------------------------------------------------------------------------------------------------------------------------------------------------------------------------------------------------------------------------------------------------------------------------------------------------------------------------------------------------------------------------|-------------------------------------------------------------------------------|
| Demir et al. (2013)    | Three university student samples:<br>S1: $N = 1,228$<br>S2: $N = 477$<br>S3: $N = 724$                                           | $M = 18.8, SD = 2.5$<br>$M = 18.9, SD = 1.9$<br>$M = 18.7, SD = 1.9$ | PSU                                      | For the three samples, respectively:<br>– Happiness, $\beta_s = .45^*, .41^*$ , and $.38^*$<br>– Friendship quality: $\beta_s = .38^*, .39^*$ , and $.36^*$                                                                                                                                                                                                                                                                                                          |                                                                               |
| Fox et al. (2009)      | Young adult women with symptoms of anorexia nervosa, $N = 31$<br>Young adult women, $N = 26$<br>Adolescent girls, $N = 71$       | 18-30<br>18-30<br>$M = 16.9, SD = 0.3$                               | PUS                                      | – Women with symptoms of anorexia nervosa had more doubts about being the same (i.e., felt more distinct) than the adolescent group.*                                                                                                                                                                                                                                                                                                                                | – No significant difference between adolescent and young women control group. |
| Galanaki (2012)        | Secondary school students in:<br>Grade 7, $N = 71$<br>Grade 9, $N = 83$<br>Grade 11, $N = 84$<br>Grade 12, $N = 76$              | $M = 12.4$<br>$M = 14.4$<br>$M = 16.4$<br>$M = 17.3$                 | NPFS Personal uniqueness & PF speciality |                                                                                                                                                                                                                                                                                                                                                                                                                                                                      | – No significant difference between grades.                                   |
| Galanaki et al. (2011) | Secondary school students, $N = 297$ , in:<br>Grade 7, $N = 71$<br>Grade 9, $N = 66$<br>Grade 11, $N = 84$<br>Grade 12, $N = 76$ | 11-18<br>$M = 12.4$<br>$M = 14.4$<br>$M = 16.4$<br>$M = 17.3$        | NPFS Personal uniqueness & PF speciality | For both subscales, respectively:<br>– General separation-individuation, $r_s = .42^*$ and $.24^*$<br>– Specifically with:<br>○ Engulfment anxiety, $r_s = .22^*$ and $.09$<br>○ Narcissistic strivings, $r_s = .27^*$ and $.23^*$<br>○ Denial of attachment needs, $r_s = .25^*$ and $.15^*$<br>○ Separation anxiety, $r_s = .00$ and $.20^*$<br>○ Healthy separation, $r_s = .17^*$ and $.17^*$<br>○ Expectation of rejection by others, $r_s = .41^*$ and $.18^*$ | – No significant difference between grades.                                   |
| Goossens et al. (2002) | High school students, $N = 1,458$                                                                                                | Grades 8, $M = 13,1$ ,<br>to 12, $M = 17,8$                          | NPFS Personal uniqueness                 | – Connectedness, $r_s = -.06, -.07$ , and $-.11^*$<br>– Separation, $r_s = .19^*, .06$ , and $.22^*$<br>– Healthy individuation, $r = .04$<br>– Depression, $r = .18^*$<br>– Loneliness, $r = .15^*$                                                                                                                                                                                                                                                                 |                                                                               |

| Authors                | Sample                                                          | Age                  | Measure distinctiveness | Associations with psychosocial functioning                                                                                                                                                                                                                                                                                                                                                                                                                                                                                                                                                                                                | Findings development                 |
|------------------------|-----------------------------------------------------------------|----------------------|-------------------------|-------------------------------------------------------------------------------------------------------------------------------------------------------------------------------------------------------------------------------------------------------------------------------------------------------------------------------------------------------------------------------------------------------------------------------------------------------------------------------------------------------------------------------------------------------------------------------------------------------------------------------------------|--------------------------------------|
| Ingoglia et al. (2016) | High school and college students, $N = 649$                     | 18-30                | SODS                    | – Emotional fragility, $r = -.41^*$                                                                                                                                                                                                                                                                                                                                                                                                                                                                                                                                                                                                       |                                      |
| Ingoglia et al. (2011) | Secondary school students, $N = 331$                            | 16-19                | SODS                    | <ul style="list-style-type: none"> <li>– Internalizing problem behavior, <math>r = -.46^*</math></li> <li>– Externalizing problem behavior, <math>r = -.07</math></li> <li>– Attitudinal autonomy, <math>r = .41^*</math></li> <li>– Functional autonomy, <math>r = .39^*</math></li> <li>– Independence from parents, <math>r = .11</math></li> <li>– Emotional closeness, <math>r = .01</math></li> <li>– Conflicts with parents, <math>r = -.15</math></li> </ul> <p>– In a model: distinctiveness predicted emotional detachment from parents, <math>\beta = .31^*</math>, but not emotional separation, <math>\beta = .11</math></p> |                                      |
| Koydemir et al. (2014) | College students, $N = 370$                                     | 18-29                | PSU                     | – Ontological well-being: $\beta = .50^*$ , controlled for extraversion and openness.                                                                                                                                                                                                                                                                                                                                                                                                                                                                                                                                                     |                                      |
| Lo Coco et al. (2014)  | Young adults, (73% university students, 22% workers), $N = 649$ | 19-29                | SODS                    | – Emotional fragility, $r = -.29^*$                                                                                                                                                                                                                                                                                                                                                                                                                                                                                                                                                                                                       |                                      |
| Lopez (2001)           | University students, $N = 247$                                  | $M = 19.5, SD = 1.2$ | SODS                    | <ul style="list-style-type: none"> <li>– Attachment anxiety, <math>r = -.50^*</math></li> <li>– Attachment avoidance, <math>r = .02</math></li> <li>– Self-splitting, <math>r = -.40^*</math></li> <li>– Other-splitting, <math>r = .15^*</math></li> <li>– Emotional empathy (i.e., reactivity), <math>r = -.34^*</math></li> </ul> <p>– Controlling for all these variables, social desirability, and self-concealment, it was still a significant predictor of self-splitting, <math>\beta = -.11^*</math>, but not other-splitting, <math>\beta = .08</math>.</p>                                                                     | – Not associated with age, $r = .09$ |

| Authors                | Sample                                            | Age                     | Measure distinctiveness            | Associations with psychosocial functioning                                                                                                                                                                                                                                                                                                                                                                                                                                                                                                                                                          | Findings development                                                 |
|------------------------|---------------------------------------------------|-------------------------|------------------------------------|-----------------------------------------------------------------------------------------------------------------------------------------------------------------------------------------------------------------------------------------------------------------------------------------------------------------------------------------------------------------------------------------------------------------------------------------------------------------------------------------------------------------------------------------------------------------------------------------------------|----------------------------------------------------------------------|
| Neff et al. (2010)     | Adolescents, $N = 235$<br>Young adults, $N = 287$ | 14-17<br>19-24          | NPFS Personal uniqueness (adapted) | For adolescents and young adults, respectively:<br>– Depressive symptoms, $r_s = .35^*$ and $.40^*$<br>– Anxiety, $r_s = .35^*$ and $.38^*$<br>– Connectedness, $r_s = -.51^*$ and $-.46^*$<br>– Secure attachment, $r_s = -.24^*$ and $-.43^*$<br>– Preoccupied attachment, $r_s = .16^*$ and $.07$<br>– Fearful attachment, $r_s = .29^*$ and $.39^*$<br>– Dismissive attachment, $r_s = .06$ and $.14^*$<br><br>– Controlling for self-compassion reduced the prediction of well-being (less depressive and anxiety symptoms and more connectedness) from $\beta = -.46^*$ to $\beta = -.29^*$ . | – No difference between adolescents and young adults, $\eta^2 = .00$ |
| Pilarska (2014)        | University students, $N = 226$                    | 18-28                   | MQI specificity                    | – Negative affect, $r = -.20^*$<br>– Positive affect, $r = .48^*$<br>– Life satisfaction, $r = .31^*$                                                                                                                                                                                                                                                                                                                                                                                                                                                                                               |                                                                      |
| Pilarska et al. (2015) | Young adults, $N = 228$                           | 18-35                   | MQI uniqueness                     | – Sense of self-worth, $r = .43^*$                                                                                                                                                                                                                                                                                                                                                                                                                                                                                                                                                                  |                                                                      |
| Şimşek et al. (2013)   | University students, $N = 290$                    | $M = 19.1$ , $SD = 3.1$ | PSU                                | – Happiness, $r = .54^*$<br>– Basic psychological need satisfaction (autonomy, competence, and relatedness), $r = .61^*$<br>– Hedonic balance, $r = .40^*$<br><br>– In a model, controlling for associations between variables, distinctiveness did not predict happiness, $\beta = .06$ , or hedonic balance, $\beta = .08$ , but did predict basic psychological need satisfaction, $\beta = .30^*$ .                                                                                                                                                                                             |                                                                      |

| Authors              | Sample                                                                         | Age                                          | Measure distinctiveness | Associations with psychosocial functioning                                                                                                                                                                    | Findings development |
|----------------------|--------------------------------------------------------------------------------|----------------------------------------------|-------------------------|---------------------------------------------------------------------------------------------------------------------------------------------------------------------------------------------------------------|----------------------|
| Şimşek et al. (2014) | Turkish university students, $N = 411$<br>American college students, $N = 370$ | $M = 19.5, SD = 1.8$<br>$M = 19.0, SD = 2.8$ | PSU                     | For Turkish and American students, respectively:<br>– Short-term happiness, $rs = .30^*$ and $.44^*$<br>– General happiness, $rs = .48^*$ and $.56^*$                                                         |                      |
| Şimşek et al. (2010) | Study 5: University students, $N = 148$                                        | 18-24                                        | PSU                     | – Anxiety, $r = -.29^*$<br>– Depression, $r = -.27^*$<br>– Self-esteem, $r = .65^*$<br>– Autonomy, $r = .59^*$<br>– Relatedness, $r = .41^*$<br>– Competence, $r = .58^*$<br>– Life satisfaction, $r = .53^*$ |                      |

*Note.* PSU scale = Personal Sense of Uniqueness scale, PUS = Personal Uniqueness Scale, NPFS = New Personal Fable Scale, PF = Personal Fable, MQI = Multidimensional Questionnaire of Identity, SODS = Self-Other Differentiation Scale.

\*  $p < .05$

Table S2

*Empirical Studies on Coherence*

| Authors                | Sample                                                  | Age   | Measure coherence                                                                                                | Associations with psychosocial functioning <sup>1</sup>                                                                                                                                                                                                                                                                                                                                                                                              | Findings development |
|------------------------|---------------------------------------------------------|-------|------------------------------------------------------------------------------------------------------------------|------------------------------------------------------------------------------------------------------------------------------------------------------------------------------------------------------------------------------------------------------------------------------------------------------------------------------------------------------------------------------------------------------------------------------------------------------|----------------------|
| Baird et al.<br>(2006) | Study 1: First-year psychology students, <i>N</i> = 270 | 18-25 | Coherence of attributes across six roles: student, friend, romantic partner, family member, worker, and stranger | <ul style="list-style-type: none"> <li>– Positive affect, <math>r = -.02</math></li> <li>– Negative affect, <math>r = -.03</math></li> <li>– Life satisfaction, <math>r = .03</math></li> </ul>                                                                                                                                                                                                                                                      |                      |
|                        | Study 2: University students, <i>N</i> = 105            | 17-20 | Same as Study 1                                                                                                  | <ul style="list-style-type: none"> <li>– Positive affect, <math>r = .01</math></li> <li>– Negative affect, <math>r = -.09</math></li> <li>– Life satisfaction, <math>r = .09</math></li> </ul>                                                                                                                                                                                                                                                       |                      |
|                        | Study 3: University students, <i>N</i> = 150            | 18-25 | Same as Study 1                                                                                                  | <ul style="list-style-type: none"> <li>– Positive affect, <math>r = .06</math></li> <li>– Negative affect, <math>r = -.20^*</math></li> <li>– Life satisfaction, <math>r = .11</math></li> </ul>                                                                                                                                                                                                                                                     |                      |
| Baird et al.<br>(2011) | Study 2: University students, <i>N</i> = 524            |       | Coherence between general self and five roles: friend, romantic partner, family, student and worker              | <ul style="list-style-type: none"> <li>– Life satisfaction, <math>r = .32^*</math></li> </ul>                                                                                                                                                                                                                                                                                                                                                        |                      |
| Baird et al.<br>(2017) | Study 1: University students, <i>N</i> = 149            |       | Coherence across four roles: friend, family member, romantic partner, and student                                | <ul style="list-style-type: none"> <li>– Self-concept clarity, <math>r = .11</math></li> <li>– Relationship satisfaction, <math>r = -.01</math></li> </ul>                                                                                                                                                                                                                                                                                           |                      |
|                        | Study 2: University students, <i>N</i> = 252            |       | Coherence across six roles.                                                                                      | <ul style="list-style-type: none"> <li>– Life satisfaction, <math>r = .04</math></li> <li>– Positive affect, <math>r = .02</math></li> <li>– Negative affect, <math>r = -.06</math></li> <li>– Daily positive affect, <math>r = .03</math></li> <li>– Daily negative affect, <math>r = -.16^*</math></li> <li>– Self-esteem, <math>r = -.02</math></li> <li>– Depression, <math>r = -.07</math></li> <li>– Anxiety, <math>r = -.11</math></li> </ul> |                      |

| Authors                 | Sample                                                                                     | Age                                    | Measure coherence                                                                                                | Associations with psychosocial functioning <sup>1</sup>                                                                                                                                                                              | Findings development                                                                                                                                                                                                                                                                                                                                                                                                           |
|-------------------------|--------------------------------------------------------------------------------------------|----------------------------------------|------------------------------------------------------------------------------------------------------------------|--------------------------------------------------------------------------------------------------------------------------------------------------------------------------------------------------------------------------------------|--------------------------------------------------------------------------------------------------------------------------------------------------------------------------------------------------------------------------------------------------------------------------------------------------------------------------------------------------------------------------------------------------------------------------------|
| Dunkel et al. (2010)    | College students, $N = 431$                                                                | 17-25                                  | Coherence across interaction with friend, parent, professor, and stranger                                        | <ul style="list-style-type: none"> <li>- Self-esteem, <math>r = .10</math></li> <li>- Sadness, <math>r = -.14^*</math></li> <li>- Hostility, <math>r = -.22^*</math></li> <li>- Identity commitment, <math>r = .00</math></li> </ul> |                                                                                                                                                                                                                                                                                                                                                                                                                                |
| Fukushima et al. (2011) | University students, $N = 168$                                                             | 18-23                                  | Coherence across five roles (if applicable): student, friend, romantic partner, son or daughter, and employee    | <ul style="list-style-type: none"> <li>- Narcissism, <math>r = -.27^*</math></li> <li>- Self-concept clarity, <math>r = .11</math></li> <li>- Self-esteem, <math>r = .09</math></li> </ul>                                           |                                                                                                                                                                                                                                                                                                                                                                                                                                |
| Harter et al. (1992)    | Secondary school students:<br>Grade 7, $N = 24$<br>Grade 9, $N = 20$<br>Grade 11, $N = 20$ | $M = 13,2$<br>$M = 15,1$<br>$M = 17,2$ | Self-opposites and conflicts across being with parents, friends, in the classroom, and in romantic relationships |                                                                                                                                                                                                                                      | <ul style="list-style-type: none"> <li>- <math>N</math> of opposites differed between the three grades.* Largest difference between grade 7 and 9, but not significant.</li> <li>- <math>N</math> of opposites in conflict: Grade 7 &lt; Grade 9 and 10.*</li> <li>- % of opposites in conflict differed not significantly.</li> <li>- % of subjects reporting at least one conflict: Grade 7 &lt; Grade 9 and 10.*</li> </ul> |
| Shadel et al. (2004)    | Early adolescents, $N = 45$<br>Middle adolescents, $N = 56$                                | 11-13<br>14-17                         | Self-conflicts across being with friends, mother, father, best friend, romantic interest, in the classroom.      |                                                                                                                                                                                                                                      | <ul style="list-style-type: none"> <li>- Early and middle adolescents did not differ significantly on <math>n</math> of self-conflicts.</li> </ul>                                                                                                                                                                                                                                                                             |
| Shadel et al. (2008)    | Adolescents, $N = 87$                                                                      | 11-17<br>$M = 13.7$<br>$SD = 2.0$      | Same as Shadel et al. (2004)                                                                                     |                                                                                                                                                                                                                                      | <ul style="list-style-type: none"> <li>- Age, <math>r = .20</math></li> </ul>                                                                                                                                                                                                                                                                                                                                                  |
| Shadel et al. (2009)    | Adolescents, $N = 85$                                                                      | $M = 13.8,$<br>$SD = 1.8$              | Same as Shadel et al. (2004)                                                                                     |                                                                                                                                                                                                                                      | <ul style="list-style-type: none"> <li>- Age, <math>r = .00</math></li> </ul>                                                                                                                                                                                                                                                                                                                                                  |

<sup>1</sup> Measures and original scores differ on whether they focus on coherence or incoherence. Presented results are adjusted, and all refer to coherence.

\*  $p < .05$

Table S3

*Empirical Studies on Continuity*<sup>a</sup>

| Authors                | Sample                                       | Age   | Measure continuity                                                            | Associations with psychosocial functioning                                                                                                                                                                                                                                                                                                                                                                                       | Findings development                                                                                                                                                                                |
|------------------------|----------------------------------------------|-------|-------------------------------------------------------------------------------|----------------------------------------------------------------------------------------------------------------------------------------------------------------------------------------------------------------------------------------------------------------------------------------------------------------------------------------------------------------------------------------------------------------------------------|-----------------------------------------------------------------------------------------------------------------------------------------------------------------------------------------------------|
| Batory (2014)          | Young adults,<br><i>N</i> = 70               | 19-29 | ISQ                                                                           | – Continuity predicted change in identity centrality, $\beta = .12^{***}$ , but not in positive affect, $\beta = -.01$ , and identity enactment, $\beta = .04$ .                                                                                                                                                                                                                                                                 |                                                                                                                                                                                                     |
| Batory (2015)          | Young adults,<br><i>N</i> = 62               | 20-26 | ISQ                                                                           | – Experimentally induced threat to identity predicted (near significant trend) stronger positive affect especially when identity continuity was high.                                                                                                                                                                                                                                                                            |                                                                                                                                                                                                     |
| Becht et al. (2016)    | Early to late adolescents,<br><i>N</i> = 494 | 13-18 | Identity classes based on:<br>– U-MICS commitment<br>– U-MICS reconsideration | – Educational identity crisis class (relative to educational identity synthesis class) related to: intercept of anxiety, $r = .23^{***}$ and intercept of aggression, $r = .23^{***}$ .<br>– Interpersonal identity crisis class (relative to interpersonal identity synthesis class) related to: intercept of anxiety, $r = .18^{**}$ and intercept of aggression, $r = .13^*$ .                                                | – Identity commitment in identity crisis classes significantly lower across adolescence.<br>– Stable commitments in identity synthesis class. U-shaped development of commitment in crisis classes. |
| Becht et al. (2017)    | Early to late adolescents,<br><i>N</i> = 494 | 13-18 | U-MICS commitment                                                             |                                                                                                                                                                                                                                                                                                                                                                                                                                  | – Within-person stability of interpersonal and educational commitment was strong, $rs = .60^{***}$ to $.67^{***}$ and $rs = .56^{***}$ to $.63^{***}$ , respectively.                               |
| Crocetti et al. (2017) | Adolescents<br><i>N</i> = 497                | 13-18 | U-MICS commitment                                                             | – Stronger commitments predicting dimensions of relationship quality 1-year later:<br>○ Maternal support: $\beta = .05^{**}$<br>○ Maternal negative interaction: $\beta = -.05^{**}$<br>○ Sibling power: $\beta = -.06^{**}$<br>– Predictions of paternal support, paternal negative interactions, paternal power, maternal power, sibling support, sibling negative interactions, and inverse predictions were not significant. |                                                                                                                                                                                                     |



| Authors                     | Sample                                                                             | Age   | Measure continuity                                                                                                                                                                                       | Associations with psychosocial functioning                                                                                                                                                                                                                                                                                                                                                                                                                                                                                                                                                                                                                                                                                                     | Findings development                                                                                                                                                                                                                                                                                           |
|-----------------------------|------------------------------------------------------------------------------------|-------|----------------------------------------------------------------------------------------------------------------------------------------------------------------------------------------------------------|------------------------------------------------------------------------------------------------------------------------------------------------------------------------------------------------------------------------------------------------------------------------------------------------------------------------------------------------------------------------------------------------------------------------------------------------------------------------------------------------------------------------------------------------------------------------------------------------------------------------------------------------------------------------------------------------------------------------------------------------|----------------------------------------------------------------------------------------------------------------------------------------------------------------------------------------------------------------------------------------------------------------------------------------------------------------|
| Crocetti et al. (2013)      | Middle to late adolescents, $N = 443$                                              | 14-18 | U-MICS commitment                                                                                                                                                                                        | – Boys and girls at risk for externalizing symptoms reported difficulties in forming strong commitments (either in the level of commitment or in the development over time).                                                                                                                                                                                                                                                                                                                                                                                                                                                                                                                                                                   |                                                                                                                                                                                                                                                                                                                |
| Habermas et al. (2015)      | $N = 150$                                                                          | 16-69 | Self-discontinuity                                                                                                                                                                                       |                                                                                                                                                                                                                                                                                                                                                                                                                                                                                                                                                                                                                                                                                                                                                | – Self-discontinuity decreased across age groups (16 to 44 years).                                                                                                                                                                                                                                             |
| Hirschi (2012) <sup>b</sup> | Early to middle adolescents, $N = 269$ , and middle to late adolescents, $N = 230$ |       | Career Maturity Inventory & Vocational Identity Scale to measure commitment<br><br>Identity statuses based on:<br>– Career Maturity Inventory or Vocational Identity Scale<br>– Career Exploration Scale | – Commitment and well-being, $r = .30^{***}$ (T1) and $r = .44^{***}$ (T2)<br>– After controlling for socio-demographics and personality traits, identity status change patterns explained relative changes in well-being. <sup>*** a</sup><br>○ $D \rightarrow M$ and $F \rightarrow M$ predicted a decrease, $\beta s = .13^*$ and $-.113^*$ , respectively.<br>○ $D \rightarrow A$ , $D \rightarrow F$ , and $M \rightarrow A$ , predicted an increase, $\beta s = .15^{**}$ , $.13^{**}$ , and $.13^{**}$ , respectively.<br>○ $A \rightarrow A$ , $A \rightarrow F$ , and $F \rightarrow A$ , predicted an increase, $\beta s = .20^{***}$ , $.19^{***}$ , and $.14^{**}$ , respectively.<br>○ The other 8 patterns were not significant. | – 4 identity statuses were identified (A, F, M, D). 42% of students showed progressive change in identity statuses. 37% remained in the same status.                                                                                                                                                           |
| Kunnen (2010)               | University students, $N = 30$                                                      | 18-23 | Identity trajectories based on:<br>– U-GIDS commitment<br>– U-GIDS exploration                                                                                                                           |                                                                                                                                                                                                                                                                                                                                                                                                                                                                                                                                                                                                                                                                                                                                                | – Across participants and six domains, based on the level of commitment and exploration 36.1% trajectories showed a pattern of above average commitment levels and above average levels of exploration. The searcher type (low and stable commitment and high and stable exploration) was least common (8.9%). |

| Authors               | Sample                                           | Age         | Measure continuity                                                                                                                                                                                                                                                       | Associations with psychosocial functioning                                                                                                                                                                                                                                                                                                                                 | Findings development                                                                                                                                                                                                                                                                                       |
|-----------------------|--------------------------------------------------|-------------|--------------------------------------------------------------------------------------------------------------------------------------------------------------------------------------------------------------------------------------------------------------------------|----------------------------------------------------------------------------------------------------------------------------------------------------------------------------------------------------------------------------------------------------------------------------------------------------------------------------------------------------------------------------|------------------------------------------------------------------------------------------------------------------------------------------------------------------------------------------------------------------------------------------------------------------------------------------------------------|
| Luyckx et al. (2013a) | Sample 1: early to middle adolescents, $N = 662$ | 14-18 at T1 | DIDS commitment making<br>DIDS identification with commitment                                                                                                                                                                                                            | <ul style="list-style-type: none"> <li>– Commitment dimensions did not predict self-esteem.</li> <li>– Self-esteem predicted identification with commitment <math>\beta = .09^*</math>, but not commitment making.</li> </ul>                                                                                                                                              |                                                                                                                                                                                                                                                                                                            |
|                       | Sample 2: University students, $N = 565$         | 17-22 at T1 | DIDS commitment making<br>DIDS identification with commitment                                                                                                                                                                                                            | <ul style="list-style-type: none"> <li>– Commitment making predicted self-esteem, <math>\beta s = .05^*</math>, and identification with commitment predicted self-esteem, <math>\beta s = .05^*</math>.</li> <li>– Self-esteem predicted commitment making, <math>\beta s = .05^*</math>, and identification with commitment, <math>\beta s = .09^{***}</math>.</li> </ul> |                                                                                                                                                                                                                                                                                                            |
|                       | Sample 3: University students, $N = 413$         | 17-24 at T1 | DIDS commitment making<br>DIDS identification with commitment                                                                                                                                                                                                            | <ul style="list-style-type: none"> <li>– Only identification with commitment predicted self-esteem, <math>\beta = .16^{***}</math>.</li> <li>– Self-esteem predicted commitment making, <math>\beta = .11^*</math> and identification with commitment, <math>\beta s</math> between <math>.13^*</math> and <math>.17^{***}</math>.</li> </ul>                              |                                                                                                                                                                                                                                                                                                            |
| Luyckx et al. (2013b) | Sample 1: University students, $N = 456$         | 17-29 at T1 | Identity statuses based on: <ul style="list-style-type: none"> <li>– DIDS commitment making</li> <li>– DIDS identification with commitment</li> <li>– DIDS exploration in breadth</li> <li>– DIDS exploration in depth</li> <li>– DIDS ruminative exploration</li> </ul> | <ul style="list-style-type: none"> <li>– Individuals in achievement trajectory classes showed the highest identity centrality, compared to the other identity classes.</li> <li>– Individuals in achievement and foreclosure trajectory classes showed lowest depressive symptoms and highest levels of self-esteem, compared to the other identity classes.</li> </ul>    | <ul style="list-style-type: none"> <li>– 5 identity status trajectories were identified (achievement, foreclosure, moratorium, carefree diffusion, troubled diffusion). 43% of university students were in high continuity identity status trajectory classes (i.e., achievement, foreclosure).</li> </ul> |

| Authors                          | Sample                                                                         | Age                        | Measure continuity                                                                                              | Associations with psychosocial functioning                                                                                                                                                                                                                                                            | Findings development                                                                                                                                                                                                                                                                                                                                                                 |
|----------------------------------|--------------------------------------------------------------------------------|----------------------------|-----------------------------------------------------------------------------------------------------------------|-------------------------------------------------------------------------------------------------------------------------------------------------------------------------------------------------------------------------------------------------------------------------------------------------------|--------------------------------------------------------------------------------------------------------------------------------------------------------------------------------------------------------------------------------------------------------------------------------------------------------------------------------------------------------------------------------------|
| Meeus et al. (2012) <sup>b</sup> | Early to middle, <i>N</i> = 923 and middle to late adolescents, <i>N</i> = 390 | 12-16 at T1<br>16-20 at T1 | Identity statuses based on:<br>– U-MICS commitment<br>– U-MICS exploration in-depth<br>– U-MICS reconsideration | In total sample:<br>– Individuals in A and EC showed lower levels of depression and delinquency, compared to M and D.                                                                                                                                                                                 | – 5 identity status trajectories were identified (A, EC, SM, M, D). 53.6% of early-to-middle adolescents, and 60.0% of middle-to-late adolescents were in high continuity identity status trajectory classes (i.e., achievement, foreclosure).<br>– The number of A was significantly higher and D was lower in middle and late adolescence compared to early to middle adolescence. |
| Mercer et al. (2017)             | Early to late adolescents, <i>N</i> = 497                                      | 14-18                      | U-MICS commitment                                                                                               | – Delinquency predicted commitment one year later, $\beta = -.12^*$ , but commitment did not predict delinquency, $\beta = -.02$ .                                                                                                                                                                    |                                                                                                                                                                                                                                                                                                                                                                                      |
| Negru-Subtirica et al. (2015)    | Early to late adolescents, <i>N</i> = 1151                                     | 13-19                      | VISA                                                                                                            | – Bidirectional over time effects between career adaptability and vocational commitment, $\beta$ s between $.05^*$ and $.10^{***}$ .                                                                                                                                                                  | – Vocational commitment making was stable, identification with vocational commitment decreased during one academic year.                                                                                                                                                                                                                                                             |
| Negru-Subtirica et al. (2016)    | Early to middle adolescents, <i>N</i> = 1062                                   | 13-15                      | DIDS commitment making<br>DIDS identification with commitment                                                   | – Only identification with commitment predicted presence of meaning 3 to 4 months later, $\beta = .11^{**}$ .<br>– Presence of meaning predicted more commitment making, $\beta = .15^{***}$ , and identification with commitment, $\beta = .17^{***}$ .                                              |                                                                                                                                                                                                                                                                                                                                                                                      |
| Pilarska (2014)                  | University students, <i>N</i> = 226                                            | 18-28                      | MQI                                                                                                             | – Correlations between continuity and negative affect, $r = -.22^{***}$ , satisfaction with life, $r = .23^{***}$ , and positive affect, $r = .13$ .                                                                                                                                                  |                                                                                                                                                                                                                                                                                                                                                                                      |
| Pilarska et al. (2015)           | Young adults, <i>N</i> = 228                                                   | 18-35                      | MQI                                                                                                             | – Correlations between continuity and sense of self-worth, $r = .50^{***}$ , exploration in-breadth, $r = -.26^{***}$ , exploration in-depth, $r = -.19^{**}$ , ruminative exploration, $r = -.38^{***}$ , commitment making, $r = .37^{***}$ , and identification with commitment, $r = .32^{***}$ . |                                                                                                                                                                                                                                                                                                                                                                                      |

| Authors                     | Sample                                       | Age         | Measure continuity | Associations with psychosocial functioning                                                                                                                                                                                                                                                                                                                                                | Findings development                                                  |
|-----------------------------|----------------------------------------------|-------------|--------------------|-------------------------------------------------------------------------------------------------------------------------------------------------------------------------------------------------------------------------------------------------------------------------------------------------------------------------------------------------------------------------------------------|-----------------------------------------------------------------------|
| Pop et al. (2016)           | Early to late adolescents<br><i>N</i> = 1151 | 13-19       | U-MICS commitment  | – Academic achievement predicted educational commitment, $\beta = .09^{***}$ but not vice versa.                                                                                                                                                                                                                                                                                          | – Educational identity commitment decreased during one academic year. |
| Schwartz et al. (2011)      | Early adolescents,<br><i>N</i> = 580         | 11-15 at T1 | U-MICS commitment  | – Commitment predicted self-concept clarity the next day, $\beta = .09^{**}$ , and self-concept clarity predicted commitment, $\beta = .07^{**}$ .<br>– Daily fluctuations in commitment predicted fluctuations in self-concept clarity, $\beta$ s = $.08^*$ to $.09^*$ , but not vice versa.<br>– Daily fluctuations in commitment did not predict anxiety or depression and vice versa. |                                                                       |
| Shirai et al. (2016)        | Young adults,<br><i>N</i> = 232              | 24-30       | ISS commitment     | – The intercept of commitment related to the intercept of delay of gratification, $r = .38^{**}$ , and the intercept of unconcern for the future, $r = -.43^{**}$ .<br>– Increasing commitment was related to increasing delay of gratification, $r = .47^{**}$ and a decreasing unconcern for the future. $r = -.96^{**}$                                                                | – Commitment and crisis were stable over time.                        |
| Van Doeselaar et al. (2016) | Adolescents<br><i>N</i> = 464                | 13-18       | U-MICS commitment  | – Commitment varied in association with balanced relatedness in friendship, $r$ s = $.06$ to $.24^{***}$ .<br>– Commitment did not predict balanced relatedness across one-year intervals, and vice versa.                                                                                                                                                                                |                                                                       |

*Note.* U-MICS = Utrecht Management of Identity Commitments Scale; VISA = Vocational Identity Status Assessment; DIDS = Dimensions of Identity Development Scale; ISS = Identity Status Scale; MQI = Multidimensional Questionnaire of Identity; ISQ = Identity Questionnaire,

<sup>a</sup> Because longitudinal studies on identity commitment have already been reviewed until 2010 by Meeus (2011), only longitudinal studies on identity commitment from 2011 onwards are included in this Table.

<sup>b</sup> D = diffusion, M = moratorium, SM = searching moratorium, EC = early closure, A = achievement.

\* $p < .05$ . \*\* $p < .01$ . \*\*\* $p < .001$ .

## Full reference list of selected empirical studies

- Aalsma, M. C., Lapsley, D. K., & Flannery, D. J. (2006). Personal fables, narcissism, and adolescent adjustment. *Psychology in the Schools, 43*, 481-491.  
doi:10.1002/pits.20162
- Alberts, A., Elkind, D., & Ginsberg, S. (2007). The personal fable and risk-taking in early adolescence. *Journal of Youth and Adolescence, 36*, 71-76. doi:10.1007/s10964-006-9144-4
- Baird, B. M., Le, K., & Lucas, R. E. (2006). On the nature of intraindividual personality variability: Reliability, validity, and associations with well-being. *Journal of Personality and Social Psychology, 90*, 512-527. doi:10.1037/0022-3514.90.3.512
- Baird, B. M., & Lucas, R. E. (2011). "... And How About Now?": Effects of Item Redundancy on Contextualized Self-Reports of Personality. *Journal of Personality, 79*, 1081-1112. doi:10.1111/j.1467-6494.2011.00716.x
- Baird, B. M., Lucas, R. E., & Donnellan, M. B. (2017). The role of response styles in the assessment of intraindividual personality variability. *Journal of Research in Personality, 69*, 170-179. doi:10.1016/j.jrp.2016.06.015
- Batory, A. (2014). Reorganization of personal identity in the context of motivational dynamics and internal dialogical activity. *Scandinavian Journal of Psychology, 55*, 362-370. doi:10.1111/sjop.12125
- Batory, A. M. (2015). What self-aspects appear significant when identity is in danger? Motives crucial under identity threat. *Journal of Constructivist Psychology, 28*, 166-180. doi:10.1080/10720537.2014.923353
- Beaudoin, K. M., & Schonert-Reichl, K. A. (2006). Epistemic reasoning and adolescent egocentrism: Relations to internalizing and externalizing symptoms in problem youth. *Journal of Youth and Adolescence, 35*, 999-1014. doi:10.1007/s10964-006-9054-5

- Becht, A. I., Nelemans, S. A., Branje, S. J., Vollebergh, W. A., Koot, H. M., Denissen, J. J. A., & Meeus, W. H. (2016). The quest for identity in adolescence: Heterogeneity in daily identity formation and psychosocial adjustment across 5 years. *Developmental Psychology, 52*, 2010-2021. doi:10.1037/dev0000245
- Becht, A. I., Nelemans, S. A., Branje, S. J. T., Koot, H. M., Vollebergh, W. A. M., & Meeus, W. H. J. (2017). Identity uncertainty and commitment making across adolescence: Five-year within-person associations using daily identity reports. *Developmental Psychology, 53*, 2103-2112. doi:10.1037/dev0000374
- Becker, M., Vignoles, V. L., Owe, E., Brown, R., Smith, P. B., Easterbrook, M., . . . Yamakoglu, N. (2012). Culture and the distinctiveness motive: Constructing identity in individualistic and collectivistic contexts. *Journal of Personality and Social Psychology, 102*, 833-855. doi:10.1037/a0026853
- Crocetti, E., Branje, S., Rubini, M., Koot, H. M., & Meeus, W. (2017). Identity processes and parent-child and sibling relationships in adolescence: A five-wave multi-informant longitudinal study. *Child Development, 88*, 210-228. doi:10.1111/cdev.12547
- Crocetti, E., Klimstra, T. A., Hale, W. W., Koot, H. M., & Meeus, W. (2013). Impact of early adolescent externalizing problem behaviors on identity development in middle to late adolescence: A prospective 7-year longitudinal study. *Journal of Youth and Adolescence, 42*, 1745-1758. doi:10.1007/s10964-013-9924-6
- Demir, M., Şimşek, Ö. F., & Procsal, A. D. (2013). I am so happy 'cause my best friend makes me feel unique: Friendship, personal sense of uniqueness and happiness. *Journal of Happiness Studies, 14*, 1201-1224. doi:10.1007/s10902-012-9376-9
- Dunkel, C. S., Minor, L., & Babineau, M. (2010). The continued assessment of self-continuity and identity. *The Journal of Genetic Psychology, 171*, 251-261. doi:10.1080/00221325.2010.483699

- Fox, A., Harrop, C., Trower, P., & Leung, N. (2009). A consideration of developmental egocentrism in anorexia nervosa. *Eating behaviors, 10*, 10-15.  
doi:10.1016/j.eatbeh.2008.10.001
- Fukushima, O., & Hosoe, T. (2011). Narcissism, variability in self-concept, and well-being. *Journal of Research in Personality, 45*, 568-575. doi:10.1016/j.jrp.2011.07.002
- Galanaki, E. P. (2012). The imaginary audience and the personal fable: A test of Elkind's theory of adolescent egocentrism. *Psychology, 3*, 457-466.  
doi:10.4236/psych.2012.36065
- Galanaki, E. P., & Christopoulos, A. (2011). The imaginary audience and the personal fable in relation to the separation-individuation process during adolescence. *Psychology: The Journal of the Hellenic Psychological Society, 18*, 85-103.
- Goossens, L., Beyers, W., Emmen, M., & Van Aken, M. A. (2002). The imaginary audience and personal fable: Factor analyses and concurrent validity of the "new look" measures. *Journal of Research on Adolescence, 12*, 193-215. doi:10.1111/1532-7795.00031
- Habermas, T., & Köber, C. (2015). Autobiographical reasoning in life narratives buffers the effect of biographical disruptions on the sense of self-continuity. *Memory, 23*, 664-674. doi:10.1080/09658211.2014.920885
- Harter, S., & Monsour, A. (1992). Development analysis of conflict caused by opposing attributes in the adolescent self-portrait. *Developmental Psychology, 28*, 251-260.  
doi:10.1037/0012-1649.28.2.251
- Hirschi, A. (2012). Vocational identity trajectories: Differences in personality and development of well-being. *European Journal of Personality, 26*, 2-12.  
doi:10.1002/per.812

- Ingoglia, S., Lo Coco, A., & Albiero, P. (2016). Development of a Brief Form of the Interpersonal Reactivity Index (B-IRI). *Journal of Personality Assessment, 98*, 461-471. doi:10.1080/00223891.2016.1149858
- Ingoglia, S., Lo Coco, A., Liga, F., & Grazia Lo Cricchio, M. (2011). Emotional separation and detachment as two distinct dimensions of parent—adolescent relationships. *International Journal of Behavioral Development, 35*, 271-281. doi:10.1177/0165025410385878
- Koydemir, S., Şimşek, Ö. F., & Demir, M. (2014). Pathways from personality to happiness: Sense of uniqueness as a mediator. *Journal of Humanistic Psychology, 54*, 314-335. doi:10.1177/0022167813501226
- Kunnen, E. (2010). Congruency between domains in commitment development. *Identity: An International Journal of Theory and Research, 10*, 254-269. doi:10.1080/15283488.2010.523321
- Lo Coco, A., Ingoglia, S., & Lundqvist, L.-O. (2014). The assessment of susceptibility to emotional contagion: A contribution to the Italian adaptation of the Emotional Contagion Scale. *Journal of Nonverbal Behavior, 38*, 67-87. doi:10.1007/s10919-013-0166-9
- Lopez, F. G. (2001). Adult attachment orientations, self-other boundary regulation, and splitting tendencies in a college sample. *Journal of Counseling Psychology, 48*, 440-446. doi:10.1037/0022-0167.48.4.440
- Luyckx, K., Klimstra, T. A., Duriez, B., Van Petegem, S., Beyers, W., Teppers, E., & Goossens, L. (2013a). Personal identity processes and self-esteem: Temporal sequences in high school and college students. *Journal of Research in Personality, 47*, 159-170. doi:10.1016/j.jrp.2012.10.005



- Luyckx, K., Klimstra, T. A., Schwartz, S. J., & Duriez, B. (2013b). Personal identity in college and the work context: Developmental trajectories and psychosocial functioning. *European Journal of Personality, 27*, 222-237. doi:10.1002/per.1903
- Meeus, W., Van de Schoot, R., Keijsers, L., & Branje, S. (2012). Identity statuses as developmental trajectories: A five-wave longitudinal study in early-to-middle and middle-to-late adolescents. *Journal of Youth Adolescence, 41*, 1008-1021. doi:10.1007/s10964-011-9730-y
- Mercer, N., Crocetti, E., Branje, S., Van Lier, P., & Meeus, W. (2017). Linking delinquency and personal identity formation across adolescence: Examining between-and within-person associations. *Developmental Psychology, 53*, 2182-2194. doi:10.1037/dev0000351
- Neff, K. D., & McGehee, P. (2010). Self-compassion and psychological resilience among adolescents and young adults. *Self and Identity, 9*, 225-240. doi:10.1080/15298860902979307
- Negru-Subtirica, O., Pop, E. I., & Crocetti, E. (2015). Developmental trajectories and reciprocal associations between career adaptability and vocational identity: A three-wave longitudinal study with adolescents. *Journal of Vocational Behavior, 88*, 131-142. doi:10.1016/j.jvb.2015.03.004
- Negru-Subtirica, O., Pop, E. I., Luyckx, K., Dezutter, J., & Steger, M. F. (2016). The meaningful identity: A longitudinal look at the interplay between identity and meaning in life in adolescence. *Developmental Psychology, 52*, 1926-1936. doi:10.1037/dev0000176
- Pilarska, A. (2014). Self-construal as a mediator between identity structure and subjective well-being. *Current Psychology, 33*, 130-154. doi:10.1007/s12144-013-9202-5

- Pilarska, A., & Suchańska, A. (2015). The identity processes and the sense of identity: Interrelations and significance to the capacity for closeness. *Studia Psychologiczne*, 53, 87-100. doi:10.2478/V1067-010-0142-3
- Pop, E. I., Negru-Subtirica, O., Crocetti, E., Opre, A., & Meeus, W. (2016). On the interplay between academic achievement and educational identity: A longitudinal study. *Journal of Adolescence*, 47, 135-144. doi:10.1016/j.adolescence.2015.11.004
- Schwartz, S. J., Klimstra, T. A., Luyckx, K., Hale, W. W., Frijns, T., Oosterwegel, A., . . . Meeus, W. H. J. (2011). Daily dynamics of personal identity and self-concept clarity. *European Journal of Personality*, 25, 373-385. doi:10.1002/per.798
- Shadel, W. G., Niaura, R., & Abrams, D. B. (2004). Who am I? The role of self-conflict in adolescents' responses to cigarette advertising. *Journal of Behavioral Medicine*, 27, 463-475. doi:10.1023/B:JOBM.0000047610.07195.b0
- Shadel, W. G., Tharp-Taylor, S., & Fryer, C. S. (2008). Exposure to cigarette advertising and adolescents' intentions to smoke: The moderating role of the developing self-concept. *Journal of Pediatric Psychology*, 33, 751-760. doi:10.1093/jpepsy/jsn025
- Shadel, W. G., Tharp-Taylor, S., & Fryer, C. S. (2009). How does exposure to cigarette advertising contribute to smoking in adolescents? The role of the developing self-concept and identification with advertising models. *Addictive Behaviors*, 34, 932-937. doi:10.1016/j.addbeh.2009.05.014
- Shirai, T., Nakamura, T., & Katsuma, K. (2016). Identity development in relation to time beliefs in emerging adulthood: A long-term longitudinal study. *Identity: An International Journal of Theory and Research*, 16, 45-58. doi:10.1080/15283488.2015.1121817

- Şimşek, Ö. F., & Demir, M. (2013). Parental support for basic psychological needs and happiness: The importance of sense of uniqueness. *Social Indicators Research, 112*, 661-678. doi:10.1007/s11205-012-0075-z
- Şimşek, Ö. F., & Demir, M. (2014). A cross-cultural investigation into the relationships among parental support for basic psychological needs, sense of uniqueness, and happiness. *The Journal of Psychology Interdisciplinary and Applied, 148*, 387-411. doi:10.1080/00223980.2013.805115
- Şimşek, Ö. F., & Yalınçetin, B. (2010). I feel unique, therefore I am: The development and preliminary validation of the Personal Sense of Uniqueness (PSU) scale. *Personality and Individual Differences, 49*, 576-581. doi:10.1016/j.paid.2010.05.006
- Van Doeselaar, L., Meeus, W., Koot, H. M., & Branje, S. (2016). The role of best friends in educational identity formation in adolescence. *Journal of Adolescence, 47*, 28-37. doi:10.1016/j.adolescence.2015.12.002
